# Supplementary material
Source: HighWire-hosted journal article supplement (https://www.annfammed.org/content/suppl/2017/03/13/15.2.158)
Supplement: Elmore_Supp_App.pdf [file Elmore_Supp_App.pdf]

## Supplemental materials for:

Anderson M, Jackson S, Oster N, Peacock S, Walker J, Elmore JG. Patients typing their own visit agendas into an electronic medical record:pilot in a safety-net clinic. *Ann Fam Med.* 2017;15(2):158-161.

# OneNote: Patient-written visit agenda study

## Patient Survey

June 3, 2015

*We are surveying patients that typed a visit agenda - or list of things that they want to talk to their doctor about. The goal of the study is to see if patients like writing an agenda and if it helps patients and doctors.*

### Part 1: About your experience with writing your own agenda for your visit

Study ID: \_\_\_\_-\_\_\_\_-\_\_\_\_

Visit Date: \_\_/\_\_/\_\_\_\_

| Because of writing my visit agenda, my doctor:                                |                       |                       |                       |                       |                       |
|-------------------------------------------------------------------------------|-----------------------|-----------------------|-----------------------|-----------------------|-----------------------|
|                                                                               | Strongly Disagree     | Disagree              | Neutral               | Agree                 | Strongly Agree        |
| 1. Seemed <b>more prepared</b> for my visit than usual                        | <input type="radio"/> |
| 2. Had a <b>better understanding</b> of my primary health concerns than usual | <input type="radio"/> |

| Writing my visit agenda:                                  |                       |                       |                       |                       |                       |
|-----------------------------------------------------------|-----------------------|-----------------------|-----------------------|-----------------------|-----------------------|
|                                                           | Strongly Disagree     | Disagree              | Neutral               | Agree                 | Strongly Agree        |
| 1. Made this visit <b>more efficient</b>                  | <input type="radio"/> |
| 2. Helped me <b>prioritize</b> my primary health concerns | <input type="radio"/> |
| 3. <b>Improved communication</b> between me and my doctor | <input type="radio"/> |

- I would **like** to type the reasons for my visit before my appointments **in the future**.
  - Strongly Agree
  - Agree
  - Neutral
  - Disagree
  - Strongly Disagree

2. When would you prefer to write your visit agenda in the future?
- Prior to your appointment (for example at home or in transit)
  - In the waiting room
  - In the exam room
  - I would rather not write a visit agenda

3. What did you like most about typing a visit agenda?

---

---

---

4. What did you like least about typing a visit agenda?

---

---

---

## Part 2: About you

1. In general, how would you rate your overall health?
- Excellent
  - Very Good
  - Good
  - Fair
  - Poor
2. How do you identify yourself?
- Male
  - Female
  - Other (please specify): \_\_\_\_\_
3. What is the highest grade or level of school that you have completed?
- 8<sup>th</sup> grade or less
  - Some high school, but did not graduate
  - High school graduate or GED
  - Some college or 2-year degree
  - 4-year college graduate
  - Some graduate school
  - Masters or Doctoral degree
4. Are you of Spanish/Hispanic/Latino ethnicity?
- Yes

No

5. What do you consider to be your racial background? (check all that apply)

- White
- Black or African American
- American Indian or Pacific Native
- Asian
- Native Hawaiian or Pacific Islander
- Other (Please specify: \_\_\_\_\_)

6. Which of the following best describes your current employment status? (check all that apply)

- Employed for wages
- Self-employed
- Homemaker
- Unemployed
- Retired
- Unable to work
- Prefer not to answer

**Thank you! We really appreciate your time and support.**

-----**TO BE FILLED OUT BY THE RESEARCHER**-----

Time taken to type agenda (minutes): \_\_\_\_

Number of characters typed: \_\_\_\_\_

Level of Service: \_\_\_\_

## OneNote: Patient-written visit agenda study

### Provider Survey – Per visit

June 3, 2015

#### Form 2

We are surveying providers of patients who contributed a patient-written visit agenda to their clinic visit note. The goal of the study is to assess the feasibility, efficiency, and patient and provider satisfaction associated with patient-written visit agendas

Study ID: \_\_\_-\_\_\_-\_\_\_

Visit Date: \_\_/\_\_/\_\_

| Overall, how did you like the visit agenda typed by the patient?                                        |                       |                       |                       |                       |                       |
|---------------------------------------------------------------------------------------------------------|-----------------------|-----------------------|-----------------------|-----------------------|-----------------------|
|                                                                                                         | Strongly Disagree     | Disagree              | Neutral               | Agree                 | Strongly Agree        |
| 1. It gave me a <b>better understanding</b> of this patient's <b>primary health concerns</b> than usual | <input type="radio"/> |
| 2. It was <b>helpful</b>                                                                                | <input type="radio"/> |

1. What did you like about this patient's written visit agenda, if any?

---

---

---

---

2. What did you dislike about this patient's written visit agenda, if any?

---

---

---

---

## OneNote: Patient-written visit agenda study Provider Survey – Cumulative June 3, 2015

**We are surveying providers of patients who contributed a visit agenda to their clinic visit note. The goal of the study is to assess the feasibility, efficiency, and patient and provider satisfaction associated with patient-written visit agendas**

### **Part 1: About your experience with your patients writing their own visit agendas for the clinic note/s**

Study ID: \_\_-\_\_

| When my patients typed their visit agenda, this:                            |                       |                       |                       |                       |                       |
|-----------------------------------------------------------------------------|-----------------------|-----------------------|-----------------------|-----------------------|-----------------------|
|                                                                             | Strongly Disagree     | Disagree              | Neutral               | Agree                 | Strongly Agree        |
| 3. Made me <b>better prepared</b> for my patients' visits than usual        | <input type="radio"/> |
| 4. Helped me <b>prioritize</b> my patients' concerns                        | <input type="radio"/> |
| 5. Helped me <b>utilize my time more efficiently</b> during my appointments | <input type="radio"/> |
| 6. <b>Improved communication</b> with my patients                           | <input type="radio"/> |

1. Overall, I would like for my patients to type visit agendas in the future
  - Strongly Disagree
  - Disagree
  - Neutral
  - Agree
  - Strongly Agree
  
2. I would prefer to read the visit agenda written by the patient:
  - The day before their appointment
  - At the time of their appointment
  - I would not read it

3. Overall, what did you like most about patients writing a visit agenda?

---

---

---

4. Overall, what did you like least about patients writing a visit agenda:

---

---

---

**Part 2: About you**

5. What is your age (years)?

- 29 years or younger
- 30-39
- 40-59
- 60 and older

6. What is your role in clinic?

- Resident
- Attending
- ARNP or PA
- Other (please specify):

7. What is your gender?

- Male
- Female
- Other (please specify:\_\_\_\_\_)
